# Supplementary material for: Proteinassembly along a supramolecular wire
Source: Royal Society of Chemistry journal article supplement (doi:10.1039/c0cc02084b), 2010-08-23
Supplement: c0cc02084b.pdf [file c0cc02084b.pdf]

## Supporting Information for:

### Protein assembly along a supramolecular wire

Marion K. Müller,<sup>a</sup> Katja Petkau,<sup>b</sup> and Luc Brunsveld<sup>\*ab</sup>

<sup>a</sup> *Chemical Genomics Centre of the Max Planck Society, Otto-Hahn Straße 15, 44227 Dortmund, Germany.*

<sup>b</sup> *Laboratory of Chemical Biology, Department of Biomedical Engineering, Technische Universiteit Eindhoven, Den Dolech 2, 5612AZ, Eindhoven, the Netherlands. Fax: (+) 31 402478367, Tel: (+) 31 402473737, E-mail: l.brunsveld@tue.nl*

#### Contents

|      |                                                                                          |     |
|------|------------------------------------------------------------------------------------------|-----|
| 1.   | Materials and Methods                                                                    | S2  |
| 2.   | Synthesis Protocols                                                                      | S4  |
| 3.   | FRET measurements                                                                        | S12 |
| 3.1. | Assembly of Cy3 <sup>®</sup> labeled streptavidin                                        | S12 |
| 3.2. | Assembly of Cy3 <sup>®</sup> labeled anti-biotin antibody                                | S12 |
| 3.3. | Assembly of Alexa Fluor 633 <sup>®</sup> and Texas Red <sup>®</sup> labeled streptavidin | S13 |

## 1. Materials and Methods

### Nuclear Magnetic Resonance Spectroscopy

$^1\text{H}$  and  $^{13}\text{C}$  NMR spectra were recorded on one of the following instruments:

Varian Mercury 400 (400 MHz,  $^1\text{H}$  NMR; 100.6 MHz,  $^{13}\text{C}$  NMR)

Bruker DRX 400 (400 MHz,  $^1\text{H}$  NMR; 100.6 MHz,  $^{13}\text{C}$  NMR)

Bruker DRX 500 (500 MHz,  $^1\text{H}$  NMR; 125.8 MHz,  $^{13}\text{C}$  NMR)

Bruker DRX 600 (600 MHz,  $^1\text{H}$  NMR; 150.9 MHz,  $^{13}\text{C}$  NMR)

with tetramethylsilane as the internal reference. The chemical shifts are provided in ppm and the coupling constants in Hz. The following abbreviations for multiplicities are used: s, singlet; d, doublet; dd, double doublet; t, triplet; q, quadruplet; m, multiplet; br, broad; ar, aromatic.

### Mass Spectrometry (MS)

ESI-mass spectra were recorded on a Finnigan LCQ ESI spectrometer.

MALDI-TOF spectra were recorded on a Voyager- DE Pro MALDI-TOF with 2,5-dihydroxybenzoic acid (DHB) as matrix (20 mg DHB, 900  $\mu\text{L}$  H<sub>2</sub>O, 90  $\mu\text{L}$  ethanol, 10  $\mu\text{L}$  TFA).

### Reversed-Phase High-Pressure Liquid Chromatography (HPLC)

Analytical HPLC was recorded on an Agilent HPLC (1100 series machine) using a CC125/4 NUCLEODUR C18 Gravity, 3  $\mu\text{m}$  (Macherey- Nagel) column with a flow of 0.1 ml/min. The standard gradient was raised from 5% to 100% acetonitrile over 11 min. TFA (0.1% v/v) was added to the HPLC solvents.

Preparative HPLC was run on an Agilent HPLC (1100 series) using a 125/21 NUCLEODUR C18 Gravity, 5  $\mu\text{m}$  (Macherey- Nagel) column.

### Flash Chromatography

Flash column chromatography was performed using flash silica gel (Merck, Darmstadt, 40-64  $\mu\text{m}$ ) or on Merck aluminum oxide 90 (70-230 mesh, activity II-III) with pressure ranging from 0.5 - 1.0 bar.

### Preparative size exclusion chromatography

Preparative size exclusion chromatography was performed on BIO RAD Bio Beads S-X1 (200-400 mesh) swollen in  $\text{CH}_2\text{Cl}_2$  or DMF.

### Chemicals

Chemicals were obtained from the following suppliers and used without further purification: Acros, Aldrich, Fluka, Lancaster, Novabiochem.  $\text{CH}_2\text{Cl}_2$  was distilled prior to use following standard protocols. Dry DMF and THF were purchased from Fluka.

NHS-PEO<sub>4</sub>-Biotin, Pierce Biotechnology, 21330

Cy3-Streptavidin, Zymed, 43-4315

Cy3-Anti biotin Antibody, Jackson ImmunoResearch, 200-162-211

TexasRed-Streptavidin, Invitrogen, S872

Alexa633-Streptavidin, Invitrogen, S21375

### **Buffer**

PBS stock solution (0.1 M, 10 fold):

1) 49.8 g  $\text{Na}_2\text{HPO}_4 \times 2 \text{H}_2\text{O}$  in 700 mL  $\text{H}_2\text{O}$

2) 19.3 g  $\text{NaH}_2\text{PO}_4 \times 1 \text{H}_2\text{O}$  in 350 mL  $\text{H}_2\text{O}$

3) 84.1 g NaCl

2) was added to 1) until the pH reached 7.3 and 3) was added subsequently.

### **Fluorescence Spectroscopy**

Fluorescence data were recorded either on a JASCO FP-6500 fluorimeter or a Cary Eclipse fluorescence spectrophotometer.

## 2. Synthesis Protocols

2,2'-Bipyridyl-3,3'-diamine **20**,<sup>1</sup> discotic **1**,<sup>2</sup> azido hexaethylene glycol **6**, and gallic acid derivative **10**<sup>3</sup> were synthesized as published.

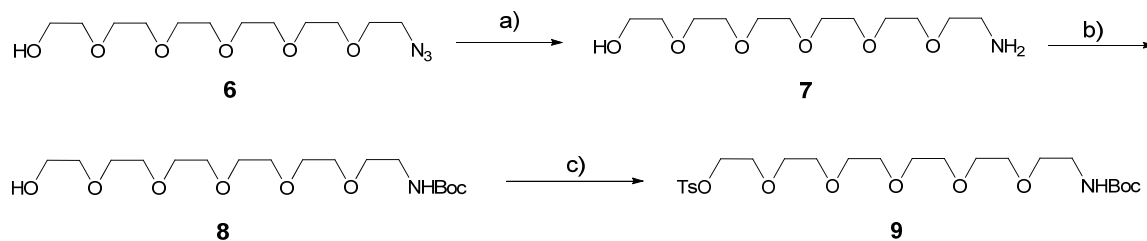

**Scheme S1.** Synthesis of the glycol side chain. a) H<sub>2</sub> (10 bar), Pd/C, ethanol/water; b) Boc<sub>2</sub>O, TEA, dioxane, 0°C-rt; c) Tosyl-Cl, TEA, THF, rt.

<sup>1</sup> C. R. Rice, S. Onions, N. Vidal, J. D. Wallis, M.-C. Senna, Melanie Pilkington, H. Stoeckli-Evans, *Eur. J. Inorg. Chem.* **2002**, 1985-1997.

<sup>2</sup> L. Brunsveld, B. G. G. Lohmeijer, J. A. J. M. Vekemans, E. W. Meijer, *J. Incl. Phen. Macrocyclic Chem.* **2001**, *41*, 61-64.

<sup>3</sup> M. K. Müller, L. Brunsveld, *Angew. Chem. Int. Ed.* **2009**, *48*, 2921-2924.



**2[-2-(2-{2-[2-(2-Hydroxyethoxy)-ethoxy]-ethoxy}-ethoxy)-ethoxy]- ethyl amine (7)**

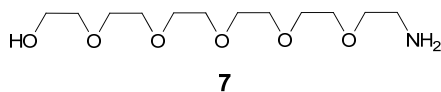

**6** (7.2 g, 23 mmol) was dissolved in ethanol (20 mL) and water (5 mL) and Pd/C (10%, 0.3 g) was added. The suspension was stirred for 48 h under an H<sub>2</sub>-atmosphere (10 bar) in an autoclave and subsequently filtered through celite®. The solvents were evaporated *in vacuo* to yield **7** (6.2 g, 22 mmol, 96%). HPLC: R<sub>t</sub> = 1.91 min; <sup>1</sup>H NMR (400 MHz, CDCl<sub>3</sub>) δ = 3.74-3.50 (m, 22H, OCH<sub>2</sub>CH<sub>2</sub>O), 2.93 (s, 2H, NH<sub>2</sub>), 2.87 (t, J=5.1, 2H, CH<sub>2</sub>NH<sub>2</sub>); <sup>13</sup>C NMR (101 MHz, CDCl<sub>3</sub>) δ = 73.1, 72.8, 70.6, 70.5, 70.20, 61.4, 41.5; MS (ESI): calcd. for [C<sub>12</sub>H<sub>27</sub>NO<sub>6</sub> + H]<sup>+</sup> m/z = 282.18 found m/z = 282.13.

**2[-2-(2-{2-[2-(2-Hydroxyethoxy)-ethoxy]-ethoxy}-ethoxy)-ethoxy]- ethyl- tert-butyl carbamate (8)**

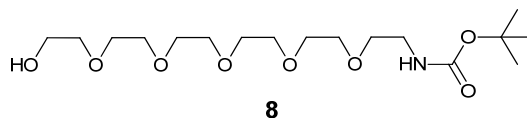

To a solution of **7** (6.2 g, 22 mmol) in dioxane (30 mL) di-*tert*-butyl dicarbonate (6.0 g, 27 mmol) was added at 0 °C and stirred for 3 h. Subsequently triethylamine (4 mL, 30 mmol) was given to the mixture and stirred over night at rt. The solvent was evaporated *in vacuo* and the crude product was purified by column chromatography (silica, 3% methanol in CH<sub>2</sub>Cl<sub>2</sub>) to yield **8** (5.1 g, 13 mmol, 59%). HPLC: R<sub>t</sub> = 6.38 min; <sup>1</sup>H NMR (400 MHz, CDCl<sub>3</sub>) δ = 5.01 (br, 1H, NH), 3.70-3.51 (m, 20H, OCH<sub>2</sub>CH<sub>2</sub>O), 3.47 (t, J = 5.2, 2H, OCH<sub>2</sub>CH<sub>2</sub>NHboc), 3.24 (dd, J = 10.1 and 5.2, 2H, OCH<sub>2</sub>CH<sub>2</sub>NHboc), 1.37 (s, 9H, OC(CH<sub>3</sub>)<sub>3</sub>); <sup>13</sup>C NMR (101 MHz, CDCl<sub>3</sub>) δ = 155.6, 79.07, 72.67-70.4, 61.8, 40.5, 28.6. MS (ESI): calcd. for [C<sub>17</sub>H<sub>35</sub>NO<sub>8</sub> + H]<sup>+</sup> m/z = 382.16 found m/z = 382.02.

**2[-2-(2-{2-[2-(2-tert-butoxycarbonylamino)-ethoxy]-ethoxy}-ethoxy)-ethoxy]- ethyl p-tosylate (9)**

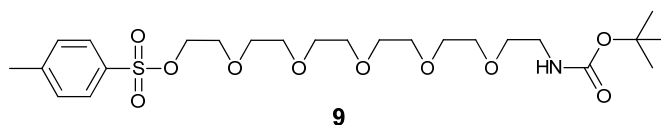

To a solution of **8** (5.06 g, 13.3 mmol) and triethylamine (5.0 mL, 38.0 mmol) in THF (50 mL) *p*-toluenesulfonyl chloride (3.04 g, 16.1 mmol) in THF (50 mL) was added dropwise. The reaction was stirred over night and then washed with 1N HCl (3 x 50 mL) and brine (50 mL). Drying over MgSO<sub>4</sub> and evaporating the solvent *in vacuo* gave the crude product. Purification by column chromatography (silica, 3% methanol in CH<sub>2</sub>Cl<sub>2</sub>) yielded the pure compound **9** as a colorless oil (4.41 g, 8.2 mmol, 62%). HPLC: R<sub>t</sub> = 8.97 min; <sup>1</sup>H NMR (400 MHz, CDCl<sub>3</sub>) δ = 7.79 (d, *J* = 8.1, 2H, *H*-benzyl), 7.33 (d, *J* = 8.1, 2H, *H*-benzyl), 5.01 (br, 1H, NH), 4.15 (t, 2H, CH<sub>2</sub>OSO<sub>2</sub>-Ar), 3.71-3.49 (m, 20H, OCH<sub>2</sub>CH<sub>2</sub>O), 3.29 (dd, *J* = 4.4, 2H, CH<sub>2</sub>NHboc), 2.44 (s, 3H, CH<sub>3</sub>Ar), 1.43 (s, 9H, OC(CH<sub>3</sub>)<sub>3</sub>); <sup>13</sup>C NMR (101 MHz, CDCl<sub>3</sub>) δ = 155.98, 144.76, 133.01, 129.79, 127.96, 79.13, 70.73, 70.60, 70.57, 70.55, 70.54, 70.50, 70.21, 69.21, 68.67, 40.35, 28.41, 21.62. MS (ESI): calcd. for [C<sub>24</sub>H<sub>41</sub>NO<sub>10</sub>S + Na]<sup>+</sup> *m/z* = 558.23 found *m/z* = 558.06.

**Methyl-4-{2[-2-(2-{2[-2-(2-tert-butoxycarbonylamino-ethoxy)-ethoxy]-ethoxy}-ethoxy)-ethoxy]-ethyl}-3,5-bis[2-(2-{2[-2-(2-methoxyethoxy)-ethoxy]-ethoxy}-ethoxy)-ethoxy]-benzoat (**11**)**

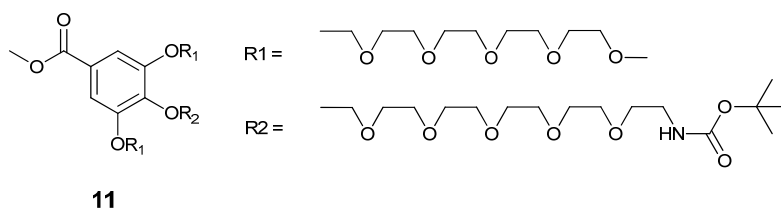

A mixture of **9** (5.60 g, 10.5 mmol), **10** (6.52 g, 10.0 mmol) and K<sub>2</sub>CO<sub>3</sub> (17.11 g, 124 mmol) was stirred 4 h at 100 °C in dry DMF (100 mL). The reaction mixture was poured into water (150 mL) and extracted with CH<sub>2</sub>Cl<sub>2</sub> (3 x 150 mL). The combined organic layers were washed with brine (100 mL), dried over MgSO<sub>4</sub> and evaporated *in vacuo*. The crude product was purified by column chromatography (alumina, 1% ethanol in chloroform) affording pure compound **11** (9.57 g, 9.4 mmol, 90%). HPLC: R<sub>t</sub> = 8.16 min; <sup>1</sup>H NMR (400 MHz, CDCl<sub>3</sub>) δ = 7.26 (s, 2H, *H*-benzoyl), 5.01 (br, 1H, NH), 4.18 (t, 4H, *m*-OCH<sub>2</sub>CH<sub>2</sub>O), 4.16 (t, 2H, *p*-OCH<sub>2</sub>CH<sub>2</sub>O), 4.07 (t, 2H, *m*-OCH<sub>2</sub>CH<sub>2</sub>O), 3.85 (s, 3H, COOCH<sub>3</sub>), 3.83 (t, 4H, *p*-OCH<sub>2</sub>CH<sub>2</sub>O), 3.79-3.45 (m, 46H, OCH<sub>2</sub>CH<sub>2</sub>O), 3.34 (s, 6H, OCH<sub>3</sub>), 3.27 (d, 2H, OCH<sub>2</sub>CH<sub>2</sub>NHboc), 1.41 (s, 9H, OC(CH<sub>3</sub>)<sub>3</sub>); <sup>13</sup>C NMR (101 MHz, CDCl<sub>3</sub>) δ = 171.3, 168.3, 152.3, 144.6, 127.0, 109.1, 79.1, 71.9, 70.8-70.2, 69.6, 68.9, 59.0, 40.3, 28.4; MS (ESI): calcd. for [C<sub>47</sub>H<sub>85</sub>NO<sub>22</sub> + NH<sub>4</sub>]<sup>+</sup> *m/z* = 1033.59 found *m/z* = 1033.33.

**4-{2[-2-(2-{2[-2-(2-tert-butoxycarbonylamino-ethoxy)-ethoxy]-ethoxy}-ethoxy)-ethoxy]-ethyl}-3,5-bis[2-(2-{2[-2-(2-methoxyethoxy)-ethoxy]-ethoxy}-ethoxy)-ethoxy]-benzoic acid (**12**)**

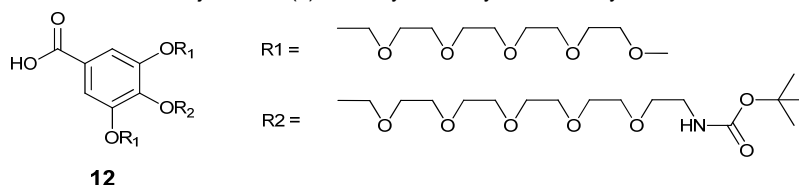

A solution of **11** (9.57 g, 9.4 mmol) and KOH (5.4 g, 28.1 mmol) in ethanol (40 mL) and water (40 mL) was heated under reflux overnight. Subsequently, the solution was acidified to pH = 2, cooled and extracted with CH<sub>2</sub>Cl<sub>2</sub> (4 x 100 mL). The CH<sub>2</sub>Cl<sub>2</sub> layer was washed with brine (70 mL). Drying over MgSO<sub>4</sub>, evaporating *in vacuo* and drying over P<sub>2</sub>O<sub>5</sub> afforded the pure compound **12** (8.81 g, 8.8 mmol, 94%). HPLC: R<sub>t</sub> = 7.41 min; <sup>1</sup>H NMR (400 MHz, CDCl<sub>3</sub>) δ = 7.35 (s, 2H, *H*-benzoyl), 5.01 (br, 1H, NH), 4.23 (t, 4H, *m*-OCH<sub>2</sub>CH<sub>2</sub>O), 4.19 (t, 2H, *p*-OCH<sub>2</sub>CH<sub>2</sub>O), 3.85 (t, 4H, *m*-OCH<sub>2</sub>CH<sub>2</sub>O), 3.82 (t, 2H, *p*-OCH<sub>2</sub>CH<sub>2</sub>O), 3.79-3.49 (m, 90H, OCH<sub>2</sub>CH<sub>2</sub>O), 3.36 (s, 6H, OCH<sub>3</sub>), 3.30 (d, 2H, OCH<sub>2</sub>CH<sub>2</sub>NHboc), 1.43 (s, 9H, OC(CH<sub>3</sub>)<sub>3</sub>); <sup>13</sup>C NMR (101 MHz, CDCl<sub>3</sub>) δ = 168.3, 156.1, 152.2, 142.9, 124.6, 109.8, 79.1, 72.0, 70.9-69.8, 59.0, 40.3, 28.4; MS (ESI): calcd. for [C<sub>46</sub>H<sub>83</sub>NO<sub>22</sub> + NH<sub>4</sub>]<sup>+</sup> *m/z* = 1019.57 found *m/z* = 1019.31.

**3'-(4-{2[-2-(2-{2[-2-(2-tert-butoxycarbonylamino-ethoxy)-ethoxy]-ethoxy)-ethoxy]-ethoxy]-ethoxy}-ethyl)-3,5-bis[2-(2-{2[-2-(2-methoxyethoxy)-ethoxy]-ethoxy]-ethoxy]-ethoxy]-benzoylamino)-2,2'-bipyridine-3-amine (15)**

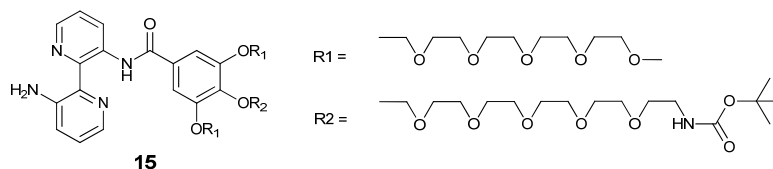

A solution of oxalyl chloride (330 mg, 2.6 mmol, 0.22 mL) in dry CH<sub>2</sub>Cl<sub>2</sub> (5 mL) containing a catalytic amount of DMF (3 drops) was added dropwise to a solution of **12** (2.17 g, 2.17 mmol) in dry CH<sub>2</sub>Cl<sub>2</sub> (5 mL). The reaction mixture was stirred overnight at rt in the absence of light. Evaporating the solvent *in vacuo* afforded the crude product **13** (2.38 g, 2.17 mmol, quant.). This product was dissolved in dry CH<sub>2</sub>Cl<sub>2</sub> (25 mL) and added dropwise to a stirred solution of 2,2'-bipyridyl-3,3'-diamine **14** (504 mg, 2.7 mmol) and triethylamine (0.17 mL, 1.22 mmol) in dry CH<sub>2</sub>Cl<sub>2</sub> (25 mL) within 1.5 h, while the temperature was kept below 5 °C. After stirring for 2 h the solvent was evaporated *in vacuo*. The crude product was purified by column chromatography (silica, ethylacetate followed by 5% methanol in chloroform) and size exclusion chromatography to yield **15** (1.34 g, 1.14 mmol, 52%) HPLC: R<sub>t</sub> = 7.92 min; <sup>1</sup>H NMR (400 MHz, CDCl<sub>3</sub>) δ = 14.39 (s, 1H, NHCO), 9.19 (dd, *J* = 8.4 and 1.4, 1H, *H*-4'), 8.31 (dd, *J* = 4.5 and 1.4, 1H, *H*-6'), 8.02 (t, *J* = 2.9, 1H, *H*-6), 7.30 (s, 2H, *H*-benzoyl), 7.28 (m, 1H, *H*-5'),



7.13 (d,  $J = 2.9$ , 2H,  $H-4$  and  $H-5$ ), 6.57 (s, 2H,  $NH_2$ ), 5.05 (s, 1H,  $NH$ ), 4.24 (t, 4H,  $m-OCH_2CH_2O$ ), 4.23 (t, 2H,  $p-OCH_2CH_2O$ ), 3.86 (t, 4H,  $m-OCH_2CH_2O$ ), 3.80 (t, 2H,  $p-OCH_2CH_2O$ ), 3.72-3.50 (m, 46H,  $OCH_2CH_2O$ ), 3.34 (s, 6H,  $m-OCH_3$ ), 3.28 (d, 2H,  $OCH_2CH_2NHboc$ ), 1.42 (s, 9H,  $OC(CH_3)_3$ );  $^{13}C$  NMR (100 MHz,  $CDCl_3$ )  $\delta = 165.7, 156.0, 152.6, 145.1, 143.6, 142.0, 140.8, 138.5, 136.1, 135.0, 130.8, 128.6, 125.3, 124.3, 122.7, 107.9, 79.1, 72.4, 71.9, 70.8, 70.6, 70.6, 70.6, 70.5, 70.5, 70.2, 69.7, 69.2, 59.0, 40.3, 28.4$ ; MS (ESI): calcd. for  $[C_{56}H_{91}NO_{21} + H]^+$   $m/z = 1170.63$  found  $m/z = 1170.37$ .

**N,N',N''-Tris{3[3'-(4-{2[-2-(2-{2[-2-(2-tert-butoxycarbonylamino-ethoxy)-ethoxy]-ethoxy)-ethoxy]-ethoxy]-ethyl}-3,5-bis[2-(2-{2[-2-(2-methoxyethoxy)-ethoxy]-ethoxy)-ethoxy]-ethoxy]-benzoylamino]-2,2'-bipyridyl}benzene-1,3,5-tricarboxamide (2a)**

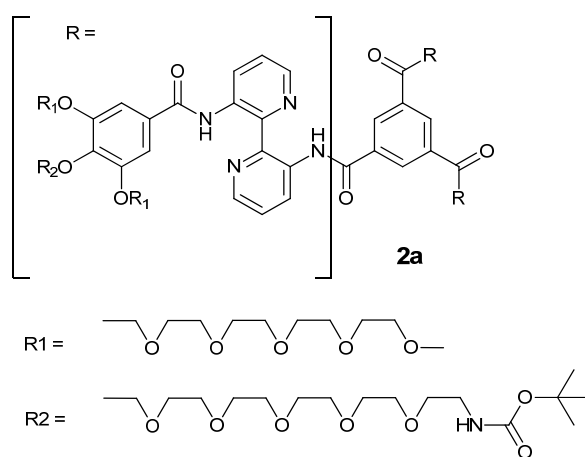

To a solution of **15** (375 mg, 0.32 mmol) and triethylamine (55  $\mu$ L, 0.4 mmol) in dry  $CH_2Cl_2$  (6 mL), a solution of trimesic chloride (26.5 mg, 0.10 mmol) in dry  $CH_2Cl_2$  (4 mL) was added dropwise at room temperature. Stirring was continued overnight, after which the solution was diluted with  $CH_2Cl_2$  (10 mL) and washed with water (2 x 10 mL). The combined water layers were extracted with  $CH_2Cl_2$  (4 x 15 mL). The combined dichloromethane layers were washed with brine (10 mL), dried over  $MgSO_4$  and evaporated *in vacuo*. The crude product was purified by size exclusion chromatography (in  $CH_2Cl_2$ ), column chromatography (silica, 10% methanol with 1% triethylamine in chloroform) and size exclusion chromatography (in  $CH_2Cl_2$ ). Drying over  $P_2O_5$  afforded **2a** (210 mg, 57  $\mu$ mol, 57%).  $^1H$  NMR (400 MHz,  $CDCl_3$ )  $\delta = 15.52$  (s, 3H,  $NHCO$ ), 14.35 (s, 3H,  $NH'CO$ ), 9.60 (dd,  $J = 8.5$  and 1.4, 3H,  $H-4$ ), 9.40 (dd,  $J = 8.6$  and 1.5, 3H,  $H-4'$ ), 9.29 (s, 3H,  $o-H$ ), 9.06 (dd,  $J = 4.6$  and 1.4, 3H,  $H-6'$ ), 8.52 (dd,  $J = 4.6$  and 1.5, 3H,  $H-6$ ), 7.57 (dd,  $J = 8.6$  and 4.6, 6H,  $H-5$  and  $H-5'$ ), 7.36 (s, 6H,  $H$ -benzoyl), 5.05 (s, 1H,  $NH$ ), 4.29 (t, 12H,  $m-OCH_2CH_2O$ ), 4.27 (t, 6H,  $p-OCH_2CH_2O$ ), 3.91 (t,  $J = 4.9$ , 12H,  $m-OCH_2CH_2O$ ), 3.91 (m, 6H,  $p-OCH_2CH_2O$ ), 3.74-3.48 (m, 150H,  $OCH_2CH_2O$ ), 3.35 (s, 18H,  $m-OCH_3$ ), 3.31 (d, 6H,  $p$ -

OCH<sub>2</sub>CH<sub>2</sub>NHboc), 1.44 (s, 27H, OC(CH<sub>3</sub>)<sub>3</sub>). <sup>13</sup>C NMR (151 MHz, CDCl<sub>3</sub>) δ = 169.1, 166.0, 164.9, 153.0, 142.6, 142.0, 141.8, 141.7, 137.8, 135.2, 132.0, 131.8, 130.2, 128.8, 128.7, 124.9, 124.6, 108.3, 79.1, 72.7-69.6, 59.2, 40.4, 28.4. MS (MALDI-TOF): calcd. for [C<sub>177</sub>H<sub>273</sub>N<sub>15</sub>O<sub>66</sub> + Na]<sup>+</sup> *m/z* = 3688.9, found *m/z* = 3689.0.

**N,N',N''-Tris{3[3'-(4-{2[-2-(2-{2-[2-(2-amino-ethoxy)-ethoxy]-ethoxy}-ethoxy)-ethoxy]-ethyl]-3,5-bis[2-(2-{2-[2-(2-methoxyethoxy)-ethoxy]-ethoxy]-ethoxy}-ethoxy)-ethoxy]-benzoylamino]-2,2'-bipyridyl}benzene-1,3,5-tricarboxamide (2b)**

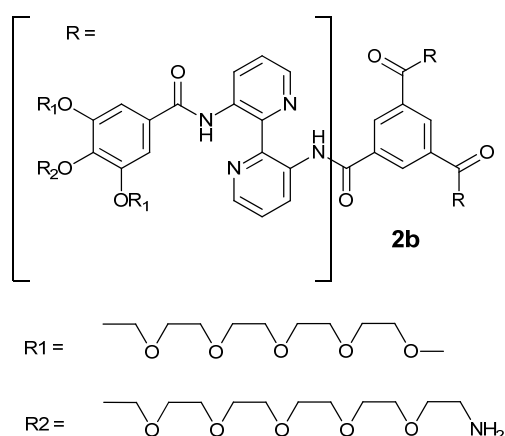

**2a** (200 mg, 54 μmol) and trifluoroacetic acid (1 mL) in CH<sub>2</sub>Cl<sub>2</sub> (3 mL) were stirred for 3 h. Toluene (3 mL) was added and the solvents were evaporated *in vacuo*. The crude product was purified by size exclusion chromatography (in CH<sub>2</sub>Cl<sub>2</sub>) affording **2b** (186 mg, 54 μmol, quant.). <sup>1</sup>H NMR (400 MHz, CDCl<sub>3</sub>) δ = 15.43 (s, 3H, NHCO), 14.45 (s, 3H, NH'CO), 9.57 (d, *J* = 8.4, 3H, *H*-4), 9.32 (d, *J* = 8.4, 3H, *H*-4'), 9.19 (s, 3H, *o*-*H*), 9.03 (d, *J* = 4.1, 3H, *H*-6'), 8.45 (s, 3H, *H*-6), 7.55 (br, 6H, *H*-5 and *H*-5'), 7.30 (s, 6H, *H*-benzoyl), 4.27 (br, 12H, *m*-OCH<sub>2</sub>CH<sub>2</sub>O), 4.26 (br, 6H, *p*-OCH<sub>2</sub>CH<sub>2</sub>O), 3.91 (br, 12H, *m*-OCH<sub>2</sub>CH<sub>2</sub>O), 3.84 (br, 6H, *p*-OCH<sub>2</sub>CH<sub>2</sub>O), 3.77-3.49 (m, 150H, OCH<sub>2</sub>CH<sub>2</sub>O), 3.33 (s, 18H, *m*-OCH<sub>3</sub>), 3.21 (br, 6H, *p*-OCH<sub>2</sub>CH<sub>2</sub>NH<sub>2</sub>). <sup>13</sup>C NMR (151 MHz, CDCl<sub>3</sub>) δ = 165.7, 164.1, 152.8, 141.8, 141.7, 141.1, 140.7, 139.5, 137.7, 135.2, 131.4, 131.2, 130.2, 129.7, 127.5, 124.9, 124.7, 107.5, 72.7-69.3, 67.2, 59.2, 40.4. MS (MALDI-TOF): calcd. for [C<sub>162</sub>H<sub>249</sub>N<sub>15</sub>O<sub>60</sub> + H]<sup>+</sup> *m/z* = 3387.63, found *m/z* = 3388.71.



### 3. FRET measurements

All samples for spectrophotometric measurements were prepared under ambient conditions in quartz cuvettes of 1 cm path length and 2 mL volume in phosphate buffer (pH 7.3). All data were acquired at 20°C.

#### 3.1. Assembly of Cy3 labeled streptavidin

A series of concentrations of Cy3<sup>®</sup> labeled streptavidin (SA-Cy3, 10<sup>-6</sup> M in phosphate buffer) ranging from 10<sup>-9</sup> to 2.5 x 10<sup>-7</sup> M was added to either **3** or **1** (each at 10<sup>-6</sup> M in phosphate buffer) at 20 °C. The mixtures were stirred for 5 min before measurement. Of each sample fluorescence spectra ( $\lambda_{\text{exc}} = 340$  nm,  $\lambda_{\text{em}} = 450 - 650$  nm) were measured. As reference the same range of concentration of Cy3<sup>®</sup> labeled streptavidin was added to pure phosphate buffer and spectra were recorded under the same conditions. These spectra were used for correction of Cy3<sup>®</sup> background fluorescence.

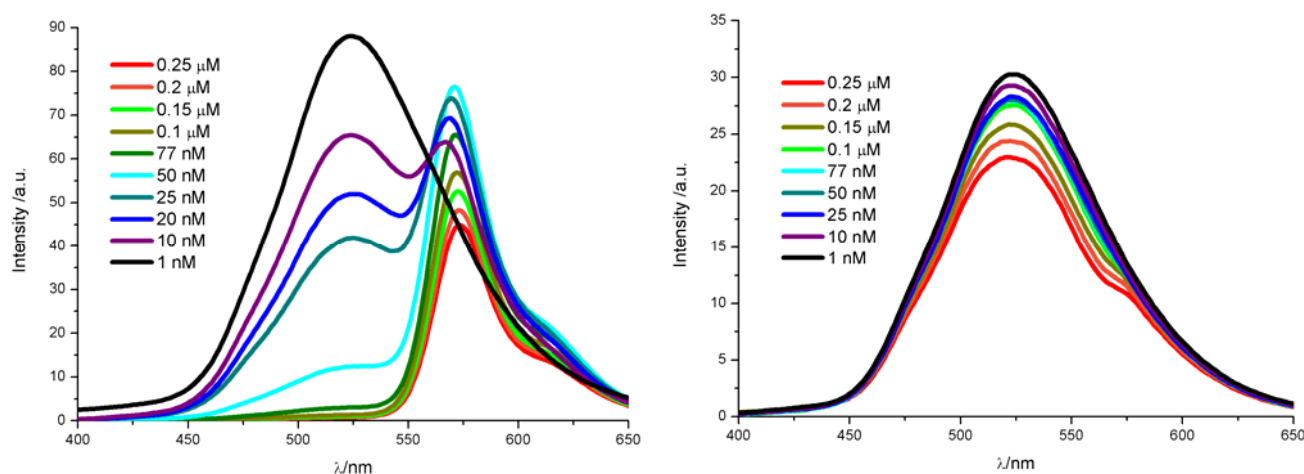

**Figure S1:** Left: titration of SA-Cy3 to **3**; right: titration of SA-Cy3 to **1**; all the data are corrected for the background fluorescence of SA-Cy3 in phosphate buffer at the excitation wavelength of 340 nm.

#### 3.2. Assembly of Cy3 labeled anti-biotin antibody

A series of concentrations of Cy3<sup>®</sup> labeled anti-biotin antibody (AB-Cy3, 10<sup>-5</sup> M in phosphate buffer) ranging from 10<sup>-9</sup> to 1.1 x 10<sup>-6</sup> M was added to either **3** or **1** (each at 10<sup>-6</sup> M in phosphate buffer) at 20 °C. The mixtures were stirred for 5 min before measurement.. Of each sample fluorescence spectra ( $\lambda_{\text{exc}} = 340$  nm,  $\lambda_{\text{em}} = 450 - 650$  nm) were measured. As reference the same range of concentration of Cy3<sup>®</sup> labeled anti biotin antibody was added to phosphate buffer and spectra were recorded under the same conditions. These spectra were used for correction of Cy3<sup>®</sup> background fluorescence.

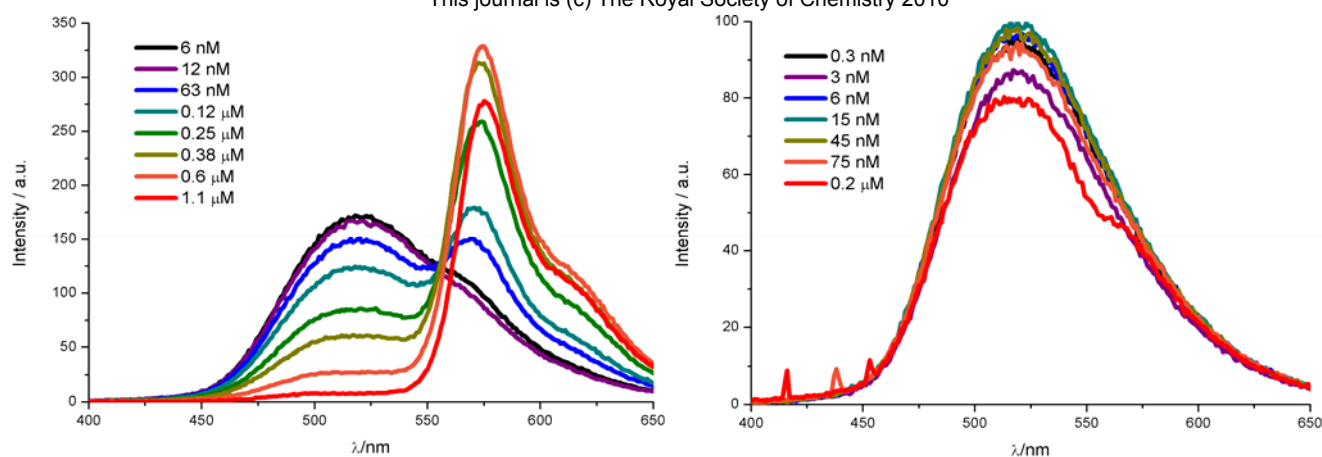

**Figure S2:** Left: titration of AB-Cy3 to **3**; right: titration of AB-Cy3 to **1**; all the data are corrected for the background fluorescence of AB-Cy3 in phosphate buffer at the excitation wavelength of 340 nm.

### 3.3. Assembly of Alexa Fluor 633 and Texas Red labeled streptavidin

Phosphate buffered solutions of Texas Red<sup>®</sup> labeled streptavidin (SA-TR) and Alexa Fluor 633<sup>®</sup> labeled streptavidin (SA-Alexa633) were mixed in a 1 to 1 ratio 2 h prior to the experiments. This protein mixture was added to **3** or **1** ( $10^{-6}$  M in phosphate buffer) or to phosphate buffer alone to reach a protein concentration of  $10^{-7}$  M each. The mixture was stirred for 10 min before fluorescence spectra were measured ( $\lambda_{\text{ex}} = 584$  nm,  $\lambda_{\text{em}} = 600 - 750$  nm). Also, Alexa Fluor 633<sup>®</sup> labeled streptavidin alone was titrated to phosphate buffer and this data was used for correction of Alexa633<sup>®</sup> background fluorescence.

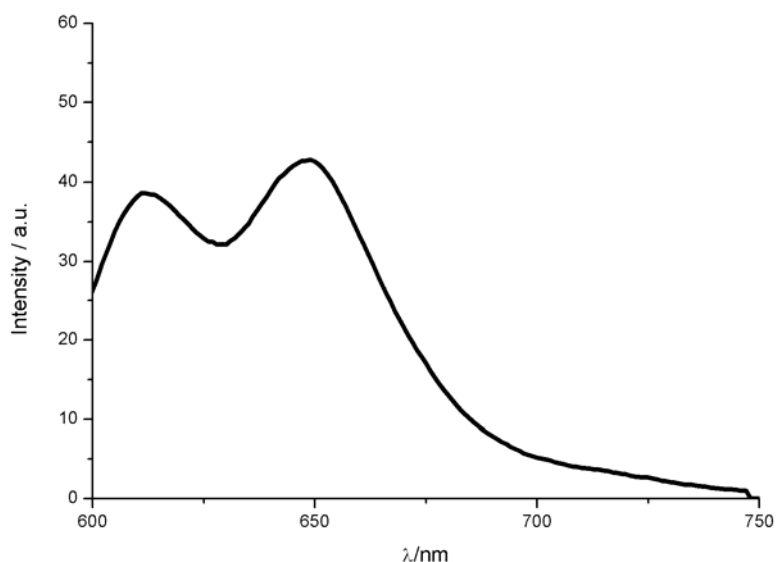

**Figure S3:** Fluorescence of a 1 to 1 mixture of SA-TR and SA-Alexa633 in phosphate buffer; data is corrected for the background fluorescence of SA-Alexa633 in phosphate buffer at the excitation wavelength of 584 nm.
